# Supplementary material for: Quantum chemical characterization and design of host materials based on phosphine oxide-substituted (triphenylamine) fluorene for (deep) blue phosphors in OLEDs
Source: Royal Society of Chemistry journal article supplement (doi:10.1039/c2cp42958f), 2012-11-27
Supplement: c2cp42958f.pdf [file c2cp42958f.pdf]

# Electronic Supplementary Information

## Quantum Chemical Characterization and Design of Host Materials based on Phosphine Oxide-Substituted (Triphenylamine) Fluorene for (deep) Blue Phosphors in OLEDs

Jie Wu,<sup>a</sup> Shui-Xing Wu,<sup>a</sup> Yong Wu,<sup>a</sup> Yu-He Kan,<sup>b</sup> Yun Geng,<sup>a</sup> and Zhong-Min Su<sup>\*a</sup>

<sup>a</sup> Institute of Functional Material Chemistry, Faculty of Chemistry, Northeast Normal University, Changchun 130024, Jilin, People's Republic of China

<sup>b</sup> Jiangsu Province Key Laboratory for Chemistry of Low-Dimensional Materials, School of Chemistry and Chemical Engineering, Huaiyin Normal University Huaiyin, China.

E-mail addresses: [zmsu@nenu.edu.cn](mailto:zmsu@nenu.edu.cn) Phone: +86-431-85099108; Fax: 86-431-85684009

### Figures and tables

**Fig. S1** The simulated absorption spectra of *p*POAPF and *p*PODPF in benzene solution by employing various TDDFT methods with 6-31+G\*\*, together with their corresponding experiment values.

**Fig. S2** The simulated emission spectra of *p*POAPF and *p*PODPF in benzene solution by employing TD-PBE0 method with 6-31+G\*\*, together with their corresponding experiment values.

**Fig. S3** The simulated absorption spectra of FIrpic and FCNIr in toluene and benzene by employing TD-PBE0 method with 6-31+G\*\*, together with their corresponding experiment values.

**Fig. S4** The simulated emission and absorption spectra from *p*PODPF/*p*POAPF and FIrpic in benzene and toluene solutions, respectively, by employing PBE0 methods with 6-31+G\*\*, together with their corresponding experimental values.

**Fig. S5** The animated figure displays the frequency vibration at 1.60 cm<sup>-1</sup> mode with “bending” character for *m*POAPF.

**Fig. S6** The animated figure displays the frequency vibration at 4.85 cm<sup>-1</sup> mode with “bending” character for *m*POAPF.

**Fig. S7** The animated figure displays the frequency vibration at 9.89 cm<sup>-1</sup> mode for *p*POAPF.

**Fig. S8** The animated figure displays the frequency vibration at 10.40 cm<sup>-1</sup> mode for *p*POAPF.

**Fig. S9** The host emission and guest absorption spectra in four groups of host-guest systems.

**Fig. S10** The obtained three T<sub>1</sub> geometries (configurations **1-3**) without imaginary frequency from different initial configurations by optimized calculation using spin-restricted DFT.

**Table S1** The absorption spectra calculated by TDDFT with 6-31+G\*\* for *p*POAPF and *p*PODPF in benzene solution, together with the available experimental values.

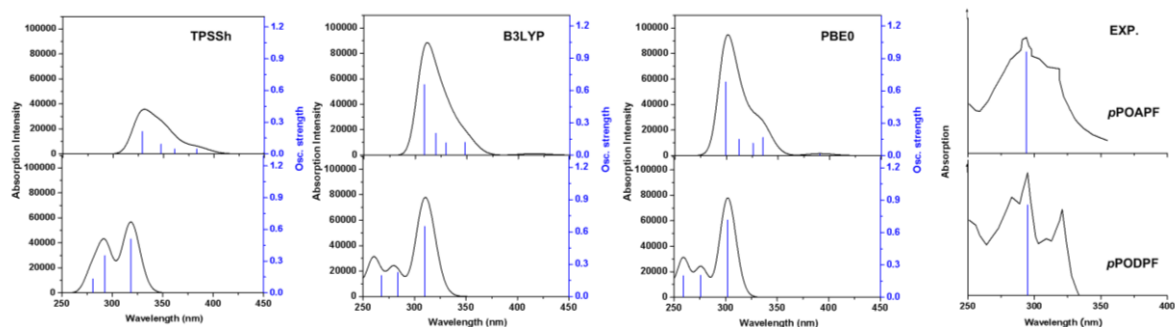

**Fig. S1** The simulated absorption spectra of *p*POAPF and *p*PODPF in benzene solution by employing various TDDFT methods with 6-31+G\*\*, together with their corresponding experiment values.<sup>1</sup>

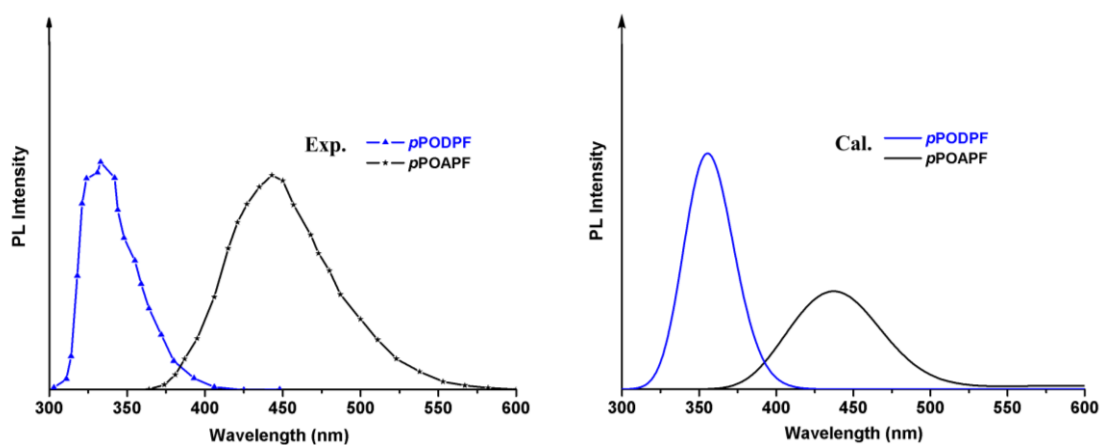

**Fig. S2** The simulated emission spectra of *p*POAPF and *p*PODPF in benzene solution by employing TD-PBE0 method with 6-31+G\*\*, together with their corresponding experiment values.<sup>1</sup>

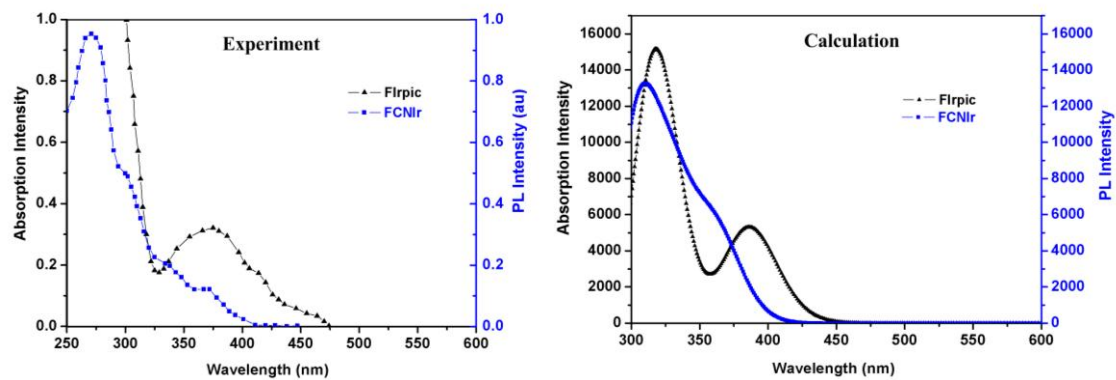

**Fig. S3** The simulated absorption spectra of Flrpic and FCNIr in toluene and benzene by employing TD-PBE0 method with 6-31+G\*\*, together with their corresponding experiment values.<sup>2,3</sup>

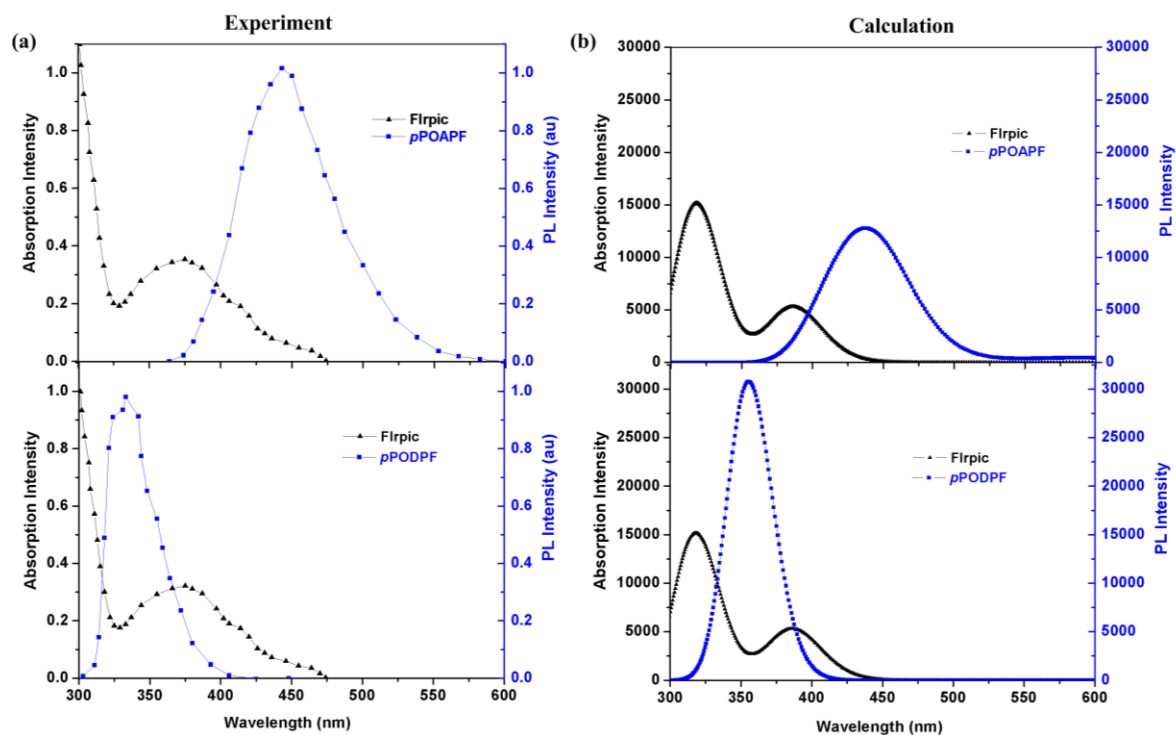

**Fig. S4** The simulated emission and absorption spectra from *p*PODPF/*p*POAPF and Flrpic in benzene and toluene solutions, respectively, by employing PBE0 methods with 6-31+G\*\*, together with their corresponding experimental values.<sup>1,2</sup>

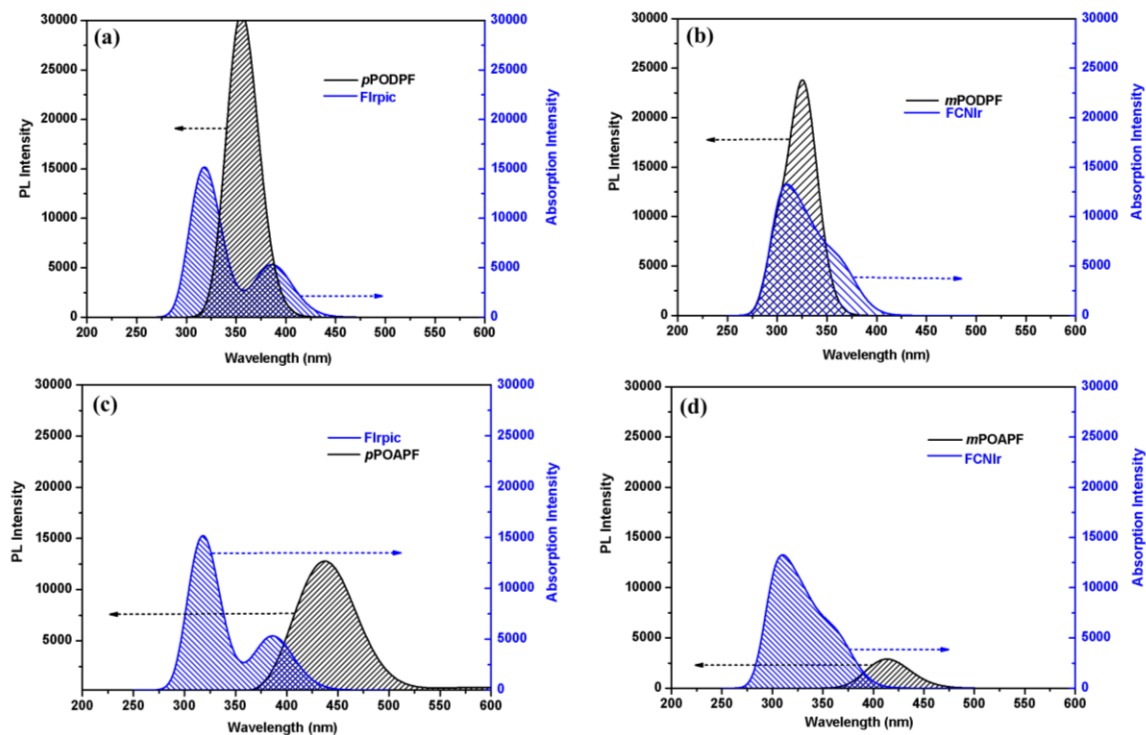

**Fig. S9** The host emission and guest absorption spectra in four groups of host-guest systems.

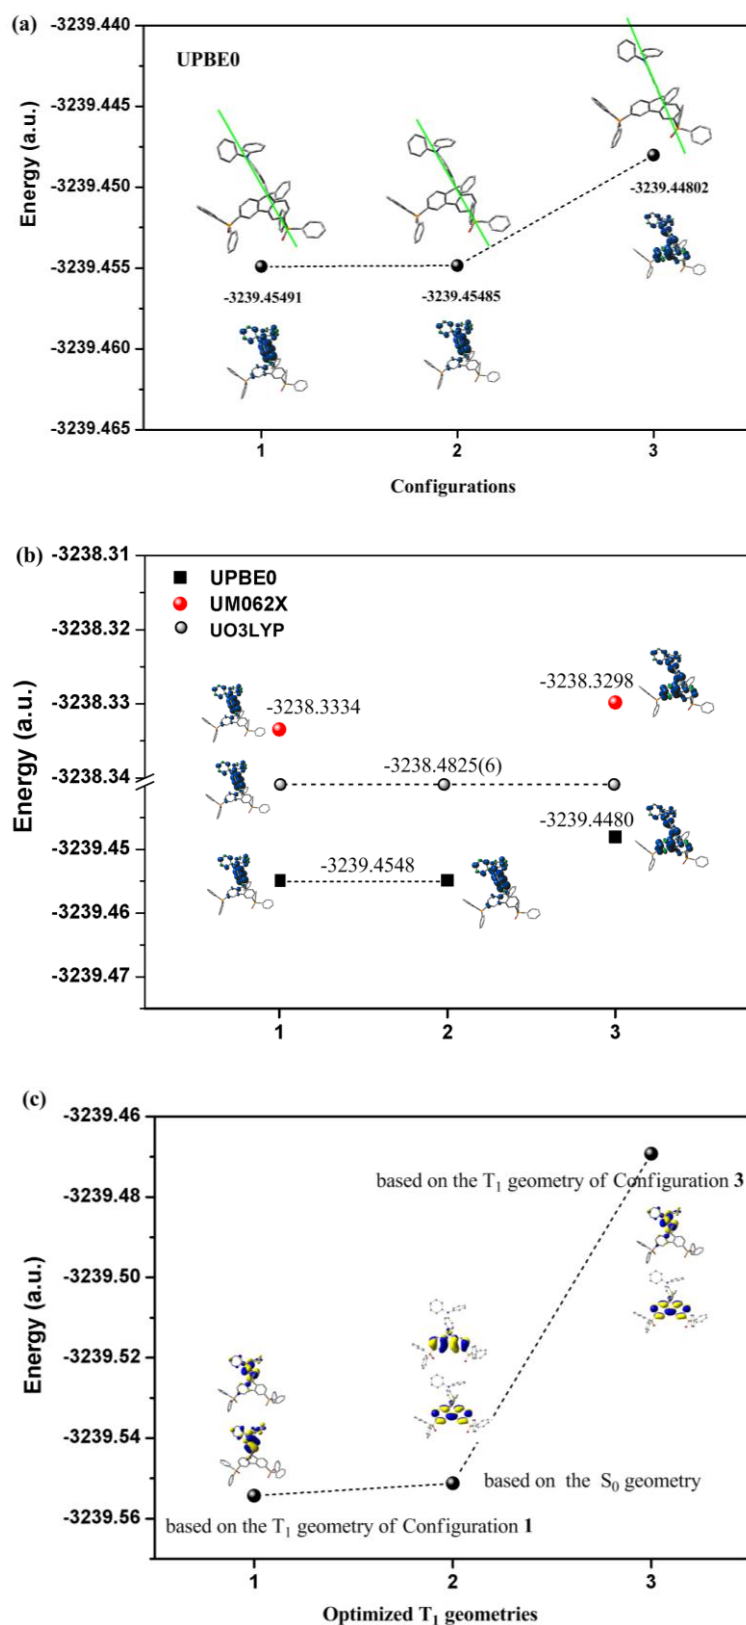

**Fig. S10.** a) The obtained three T<sub>1</sub> geometries (configurations 1-3) without imaginary frequency from different initial configurations by optimized calculation using spin-unrestricted PBE0 functional (UPBE0), the corresponding spin density distribution and triplet energies at three T<sub>1</sub> geometries. b) The obtained T<sub>1</sub> geometries without imaginary frequency from different initial configurations by optimized calculation using spin-unrestricted PBE0, O3LYP, and M062X functionals, the

corresponding spin density distribution and triplet energies at the  $T_1$  geometries. c) The energies of three optimized  $T_1$  geometries by TD-PBE0 calculation from configurations **1**, **3** (**Fig. S10a**) and  $S_0$  geometry (PBE0), respectively. And, hole-electron pairs of  $T_1$  transition orbitals based on the three optimized  $T_1$  geometries.

**Table S1** The absorption spectra calculated by TDDFT with 6-31+G\*\* for *p*POAPF and *p*PODPF in benzene solution, together with the available experimental values.

| Compounds      | Cal.  |                                 |                |                            |                         | Exp.             |
|----------------|-------|---------------------------------|----------------|----------------------------|-------------------------|------------------|
|                | TDDFT | State ( $f_{\max}$ )            | $\lambda$ (nm) | Config. (CI coeff.)        | Assignment              | $\lambda$ (nm)   |
| <i>p</i> POAPF | B3LYP | $S_0 \rightarrow S_9$ (0.65)    | 308            | H-1 $\rightarrow$ L (91%)  | $\pi \rightarrow \pi^*$ | 294 <sup>1</sup> |
|                | TPSSh | $S_0 \rightarrow S_{12}$ (0.21) | 318            | H $\rightarrow$ L +8 (97%) | $\pi \rightarrow \pi^*$ | –                |
|                | PBE0  | $S_0 \rightarrow S_7$ (0.68)    | 299            | H-1 $\rightarrow$ L (90%)  | $\pi \rightarrow \pi^*$ | –                |
| <i>p</i> PODPF | B3LYP | $S_0 \rightarrow S_1$ (0.65)    | 310            | H $\rightarrow$ L (92%)    | $\pi \rightarrow \pi^*$ | 295 <sup>1</sup> |
|                | TPSSh | $S_0 \rightarrow S_1$ (0.51)    | 318            | H $\rightarrow$ L (87%)    | $\pi \rightarrow \pi^*$ | –                |
|                | PBE0  | $S_0 \rightarrow S_1$ (0.72)    | 302            | H $\rightarrow$ L(94%)     | $\pi \rightarrow \pi^*$ | –                |

## References

- 1 F. M. Hsu, C. H. Chien, C. F. Shu, C. H. Lai, C. C. Hsieh, K. W. Wang and P. T. Chou, *Adv. Funct. Mater.*, 2009, **19**, 2834-2843.
- 2 G. Cheng, T. Fei, Y. Zhao, Y. Ma and S. Liu, *Org. Electron.*, 2010, **11**, 498-502.
- 3 K. S. Yook, S. O. Jeon, C. W. Joo and J. Y. Lee, *Thin Solid Films*, 2010, **518**, 4462-4466.
